# Supplementary material
Source: HighWire-hosted journal article supplement (https://erj.ersjournals.com/content/59/4/2100664)

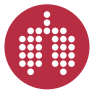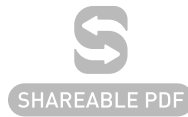

# Protease activity sensors enable real-time treatment response monitoring in lymphangioleiomyomatosis

Jesse D. Kirkpatrick<sup>1,2</sup>, Ava P. Soleimany<sup>1,2,3,4</sup>, Jaideep S. Dudani<sup>1,5</sup>, Heng-Jia Liu<sup>6</sup>, Hilaire C. Lam<sup>6</sup>, Carmen Priolo<sup>6</sup>, Elizabeth P. Henske<sup>6,12</sup> and Sangeeta N. Bhatia<sup>1,2,7,8,9,10,11,12</sup>

<sup>1</sup>Koch Institute for Integrative Cancer Research, Massachusetts Institute of Technology, Cambridge, MA, USA. <sup>2</sup>Harvard-MIT Division of Health Sciences and Technology, Institute for Medical Engineering and Science, Massachusetts Institute of Technology, Cambridge, MA, USA. <sup>3</sup>Harvard Graduate Program in Biophysics, Harvard University, Boston, MA, USA. <sup>4</sup>Microsoft Research New England, Cambridge, MA, USA. <sup>5</sup>Dept of Biological Engineering, Massachusetts Institute of Technology, Cambridge, MA, USA. <sup>6</sup>Pulmonary and Critical Care Medicine, Dept of Medicine, Brigham and Women's Hospital and Harvard Medical School, Boston, MA, USA. <sup>7</sup>Howard Hughes Medical Institute, Cambridge, MA, USA. <sup>8</sup>Dept of Electrical Engineering and Computer Science, Massachusetts Institute of Technology, Cambridge, MA, USA. <sup>9</sup>Dept of Medicine, Brigham and Women's Hospital, Harvard Medical School, Boston, MA, USA. <sup>10</sup>Broad Institute of Massachusetts Institute of Technology and Harvard, Cambridge, MA, USA. <sup>11</sup>Wyss Institute at Harvard, Boston, MA, USA. <sup>12</sup>E.P. Henske and S.N. Bhatia co-supervised the study.

Corresponding author: Sangeeta N. Bhatia ([sbhatia@mit.edu](mailto:sbhatia@mit.edu))

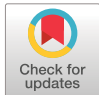

Shareable abstract (@ERSpublications)

**Nanoparticles that noninvasively measure the activity of proteases in the lungs enable real-time monitoring of disease progression and therapeutic response in a mouse model of lymphangioleiomyomatosis** <https://bit.ly/3z4cnAh>

**Cite this article as:** Kirkpatrick JD, Soleimany AP, Dudani JS, *et al.* Protease activity sensors enable real-time treatment response monitoring in lymphangioleiomyomatosis. *Eur Respir J* 2022; 59: 2100664 [DOI: 10.1183/13993003.00664-2021].

This single-page version can be shared freely online.

Copyright ©The authors 2022.

This version is distributed under the terms of the Creative Commons Attribution Non-Commercial Licence 4.0. For commercial reproduction rights and permissions contact [permissions@ersnet.org](mailto:permissions@ersnet.org)

This article has an editorial commentary: <https://doi.org/10.1183/13993003.00405-2022>

Received: 4 March 2021  
Accepted: 14 Aug 2021

## Abstract

**Background** Biomarkers of disease progression and treatment response are urgently needed for patients with lymphangioleiomyomatosis (LAM). Activity-based nanosensors, an emerging biosensor class, detect dysregulated proteases *in vivo* and release a reporter to provide a urinary readout of disease. Because proteases are dysregulated in LAM and may directly contribute to lung function decline, activity-based nanosensors may enable quantitative, real-time monitoring of LAM progression and treatment response. We aimed to assess the diagnostic utility of activity-based nanosensors in a pre-clinical model of pulmonary LAM.

**Methods** *Tsc2*-null cells were injected intravenously into female nude mice to establish a mouse model of pulmonary LAM. A library of 14 activity-based nanosensors, designed to detect proteases across multiple catalytic classes, was administered into the lungs of LAM mice and healthy controls, urine was collected, and mass spectrometry was performed to measure nanosensor cleavage products. Mice were then treated with rapamycin and monitored with activity-based nanosensors. Machine learning was performed to distinguish diseased from healthy and treated from untreated mice.

**Results** Multiple activity-based nanosensors (PP03 (cleaved by metallo, aspartic and cysteine proteases),  $P_{\text{adjusted}} < 0.0001$ ; PP10 (cleaved by serine, aspartic and cysteine proteases),  $P_{\text{adjusted}} = 0.017$ ) were differentially cleaved in diseased and healthy lungs, enabling strong classification with a machine learning model (area under the curve (AUC) 0.95 from healthy). Within 2 days after rapamycin initiation, we observed normalisation of PP03 and PP10 cleavage, and machine learning enabled accurate classification of treatment response (AUC 0.94 from untreated).

**Conclusions** Activity-based nanosensors enable noninvasive, real-time monitoring of disease burden and treatment response in a pre-clinical model of LAM.

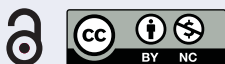

Supplement: inline-supplementary-material-2 [file inline-supplementary-material-2.pdf]
